# Supplementary material for: Performance Characteristics of the Ultrasound Strategy during Incidence Screening in the UK Collaborative Trial of Ovarian Cancer Screening (UKCTOCS)
Source: Cancers (Basel). 2021 Feb 18;13(4):858. doi: 10.3390/cancers13040858 (PMC7922843; doi:10.3390/cancers13040858)
Supplement: Supplementary file 1 [file cancers-13-00858-s001.xlsx]

## Sheet: Sheet1
	Table S1. Surgical complications in women with benign pathology or normal adnexa
		Complication type	Women (No.)
		Related to anesthetic
		Cardiac arrest intra-op - chest compression carried out for 30sec	1
		Aspiration during induction of anaesthetic and was then adminted to ICU and on ventilator	1
		Intra-operatively ECG changes suggestive of an ischaemic heart event but asymptomatic on the recovery ward on awakening	1
		Bladder injury	3
		Bowel obstruction	3
		GI injury	2
		Haemorrhage	5
		Vascular injury
		Injury to inferior vena cava from laparoscopic trocar, repaired intraoperatively	1
		Hematoma	1
		Abdominal bruising with some epigastic discomfort; the other had wound hematoma drained on the ward	1
		Wound hematoma drained on the ward	1
		Hernia	4
		Intra-abdominal abscess
		Treated with antibiotics (Augmentin, Metronidazole, Cefuroxime and Flucloxacillin	1
		Pulmonary embolism	1
		Respiratory complication
		Post operatively developed respiratory distress and was admitted to HDU for observation	1
		Patient declined in condition 2 days post-op and cardiac arrest team was called - respiratory distress, O2 mask and reservoir bag but cardiac output never lost (notes state Type 2 respiratory failure)	1
		Pyrexia/infection	4
		Pain - ward readmission	1
		Wound breakdown	2
		Total	35
